# Supplementary material
Source: PubMed Central journal article supplement (PMC3536920)

**Fig. E1** Lung function decline model

|             | Estimate | Robust S.E. | Robust z |
|-------------|----------|-------------|----------|
| (Intercept) | 5.029    | 0.0822      | 61.2     |
| cig.avg     | -0.001   | 0.0002      | -7.0     |
| smoker      | -0.017   | 0.0075      | -2.3     |
| smoker2     | -0.029   | 0.0043      | -6.7     |
| time        | -0.055   | 0.0023      | -24.4    |
| sex         | -0.925   | 0.0124      | -74.7    |
| fitted.bmi  | -0.076   | 0.0239      | -3.2     |
| age         | -0.034   | 0.0009      | -35.8    |
| center2     | 0.076    | 0.0281      | 2.7      |
| center3     | 0.077    | 0.0270      | 2.8      |
| center4     | -0.040   | 0.0290      | -1.4     |
| center5     | 0.141    | 0.0294      | 4.8      |
| center6     | -0.035   | 0.0303      | -1.2     |
| center7     | 0.129    | 0.0278      | 4.6      |
| center8     | 0.108    | 0.0270      | 4.0      |
| center9     | 0.124    | 0.0273      | 4.5      |
| center10    | 0.113    | 0.0279      | 4.1      |
| smoker:time | -0.008   | 0.0023      | -3.6     |
| time:sex    | 0.007    | 0.0016      | 4.0      |

**Fig. E2a** Epithelial staining for FOXA1 (a) minimal staining (b) moderate staining (c) intense staining (d) color segmented image

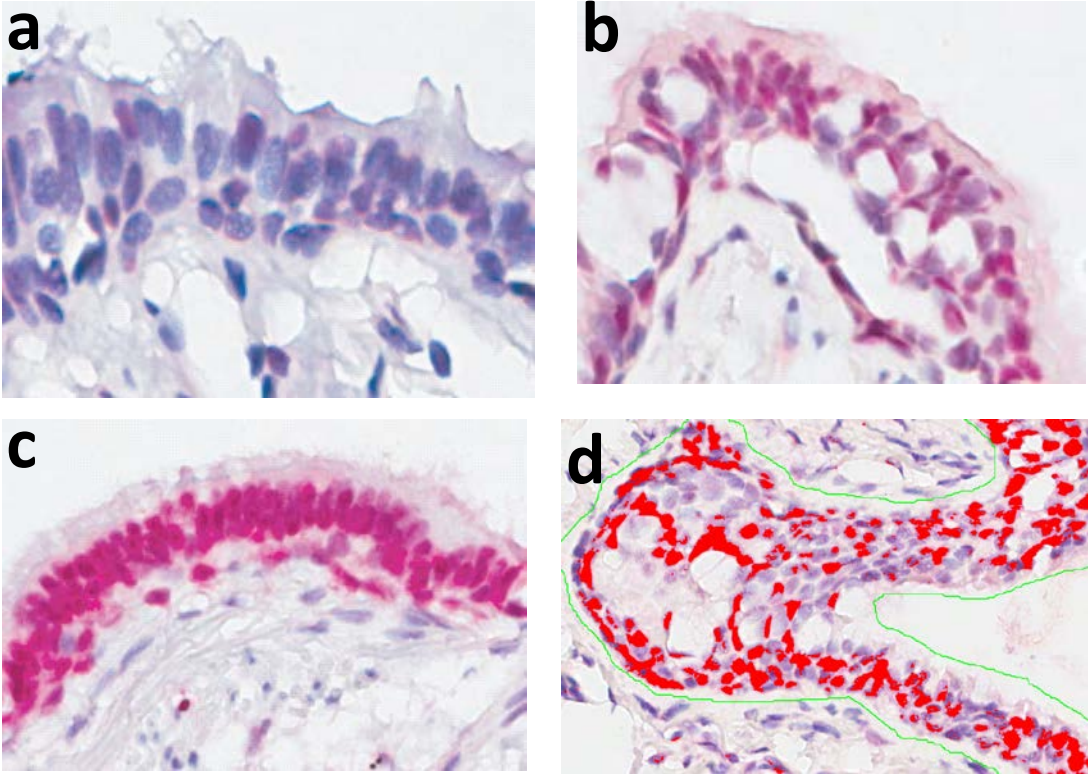

**Fig. E2b** Parenchymal staining for FOXA1 (a) minimal staining (b) moderate (c) intense staining and (d) color segmented image

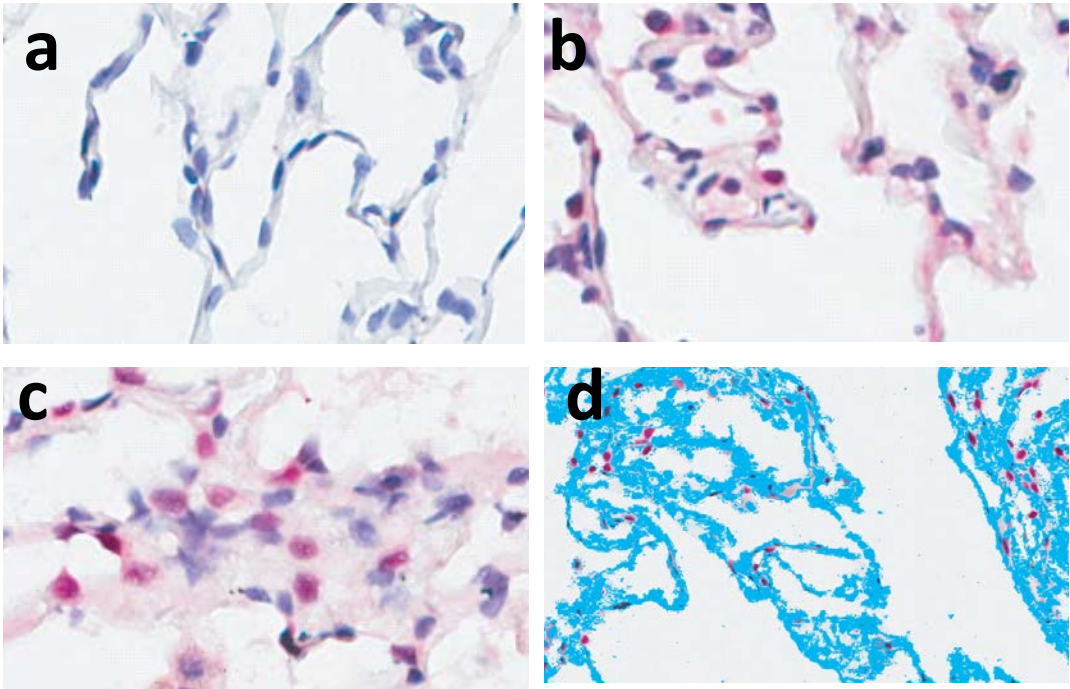

**Fig. E3** Epithelial and parenchymal FOXA1 expression in the lung

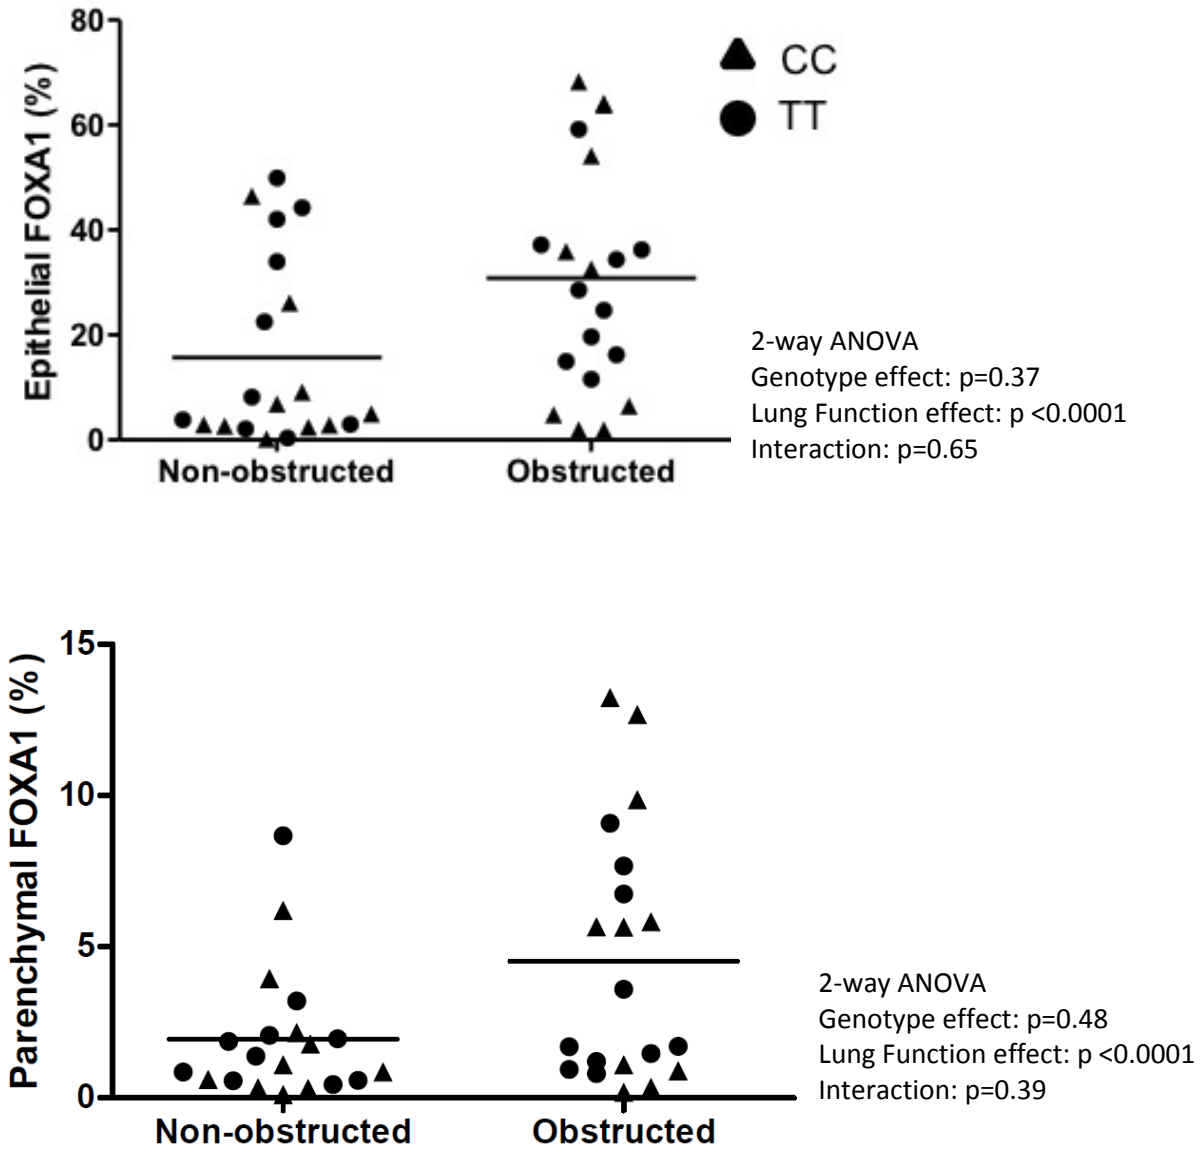

**Fig. E4** Epithelial and parenchymal staining for TMEM26 in lung tissue of smokers. (a) moderate staining in airway epithelium, (b) intense staining in airway epithelium, (c) minimal staining in parenchyma (d) moderate staining in parenchyma

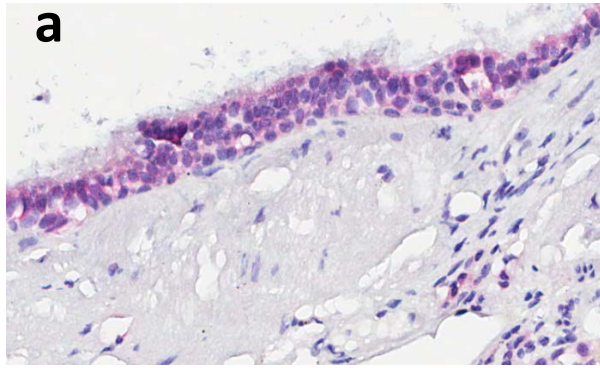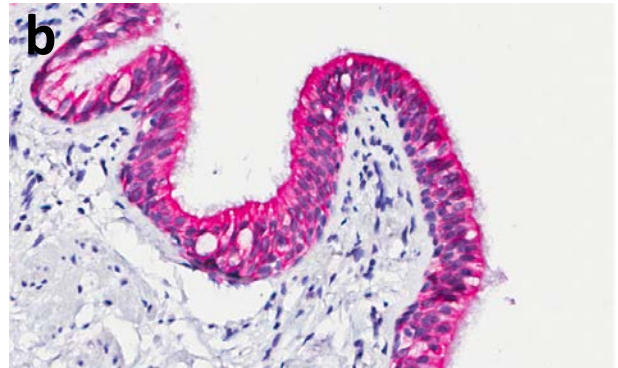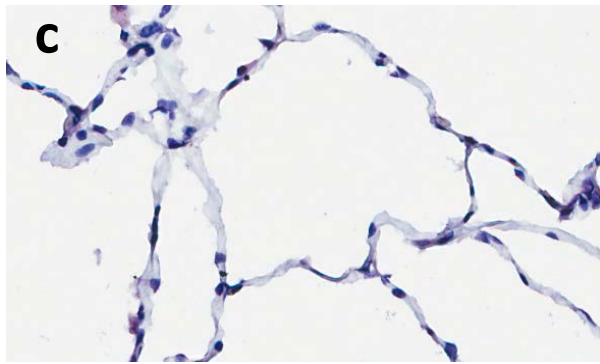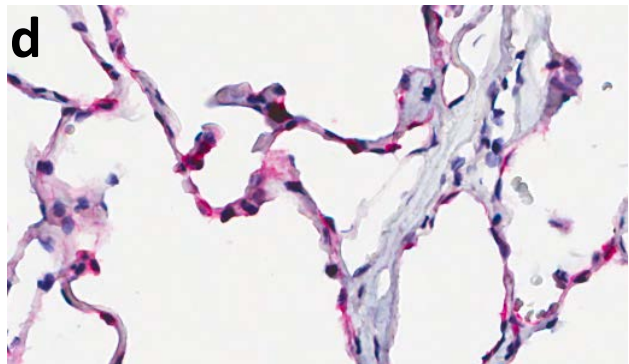

**Fig. E5** Epithelial and parenchymal TMEM26 expression in the lung by lung function and genotype

## Epithelial TMEM26

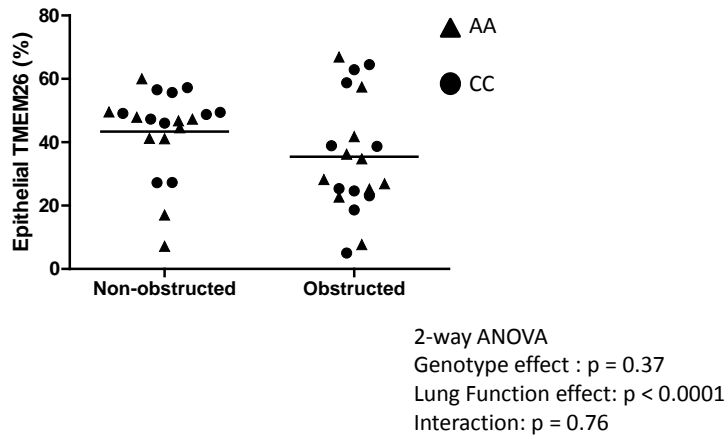

## Parenchymal TMEM26

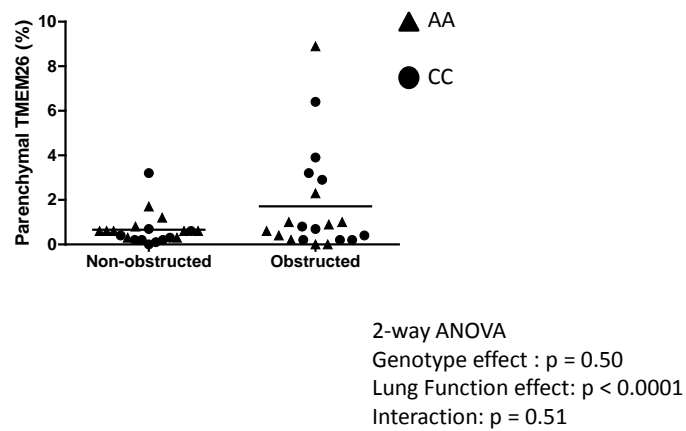

Supplement: NIHMS408610-supplement-439_2012_1219_MOESM2_ESM.pdf [file NIHMS408610-supplement-439_2012_1219_MOESM2_ESM.pdf]
